# Supplementary material for: Synergetic microstructure engineering by induced ZB/WZ twin boundaries and S vacancies in a Zn0.5Cd0.5S-based S-scheme photocatalyst for highly efficient photocatalytic hydrogen production
Source: Royal Society of Chemistry journal article supplement (doi:10.1039/d3qi01187a), 2023-01-01
Supplement: d3qi01187a1.pdf [file d3qi01187a1.pdf]

## Electronic Supporting Information

1

2

3 **Synergetic microstructure engineering by induced ZB/WZ twin**  
4 **boundaries and S vacancies in Zn<sub>0.5</sub>Cd<sub>0.5</sub>S solid solution containing**  
5 **ZIF-8 as substrate for highly efficient photocatalytic hydrogen**  
6 **production**

7

8 **Yuhao Zhang<sup>a, b, d</sup>, Dingze Lu<sup>a, b, c\*</sup>, Zhennan Wang<sup>b</sup>, Min Zhou<sup>b</sup>, Kiran Kumar**  
9 **Kondamareddy<sup>c\*</sup>, Jing Li<sup>b</sup>, Huiqing Fan<sup>c</sup>, Dezhong Cao<sup>b</sup>, Wingkei Ho<sup>a\*</sup>**

10

11 *<sup>a</sup>Department of Science and Environmental Studies, The Education University of Hong Kong, Tai*  
12 *Po, New Territories, Hong Kong 999077, PR China*

13 *<sup>b</sup>School of Science, Xi'an Polytechnic University, No.19 of Jinhua South Road, Beilin District, Xi'an*  
14 *710048, PR China*

15 *<sup>c</sup>State Key Laboratory of Solidification Processing, School of Materials Science and Engineering,*  
16 *Northwestern Polytechnical University, Xi'an 710072, PR China*

17 *<sup>d</sup>Common course, Shaanxi Polytechnic Institute, Xian'yang, 712000, PR China*

18 *<sup>e</sup>Department of Physics, School of Pure Sciences, College of Engineering Science and Technology,*  
19 *Fiji National University, Lautoka, PO Box 5529. Fiji*

20

21 *\*Corresponding author at: Department of Science and Environmental Studies, and the Centre for*  
22 *Environment and Sustainable Development (CESD), The Education University of Hong Kong, Tai*  
23 *Po, N.T., Hong Kong, China.*

24 *\*Corresponding author.*

25 *E-mail addresses: keithho@eduhk.hk (W. Ho), ludingze@whu.edu.cn (D.Z. Lu);*  
26 *kiran.kondamareddy@fnu.ac.fj (K.K.K).*

27

28 **Experimental section**

29

30 **Table S1.** The preparation detail information of ZCS, ZCS-V, T-ZCS and T-ZCSv.

| Samples | Materials                                                            | Solvent                                                   | Reaction conditions |
|---------|----------------------------------------------------------------------|-----------------------------------------------------------|---------------------|
| ZCS     | cadmium acetate dihydrate<br>zinc acetate dihydrate<br>thiourea      | water                                                     | 220 °C, 12 h        |
| ZCS-V   | cadmium acetate dihydrate<br>zinc acetate dihydrate<br>thiourea      | water and N <sub>2</sub> H <sub>4</sub> ·H <sub>2</sub> O | 220 °C, 12 h        |
| T-ZCS   | cadmium acetate dihydrate<br>zinc acetate<br>thioacetamide           | alcohol                                                   | 160 °C, 24 h.       |
| T-ZCSv  | cadmium acetate dihydrate<br>zinc acetate dihydrate<br>thioacetamide | water and NaOH (4M)                                       | 180 °C, 24 h.       |

31

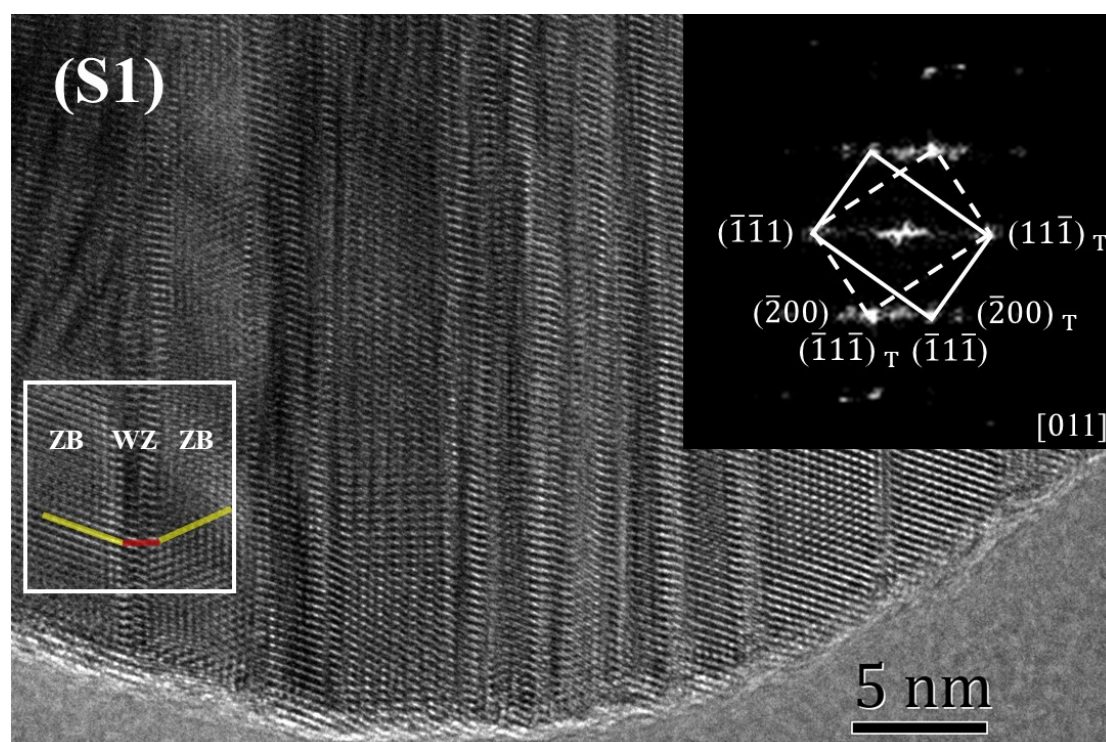

32

33 **Figure S1.** The wurtzite structure with two or three diatomic layers for T-ZCSv nanocrystals.

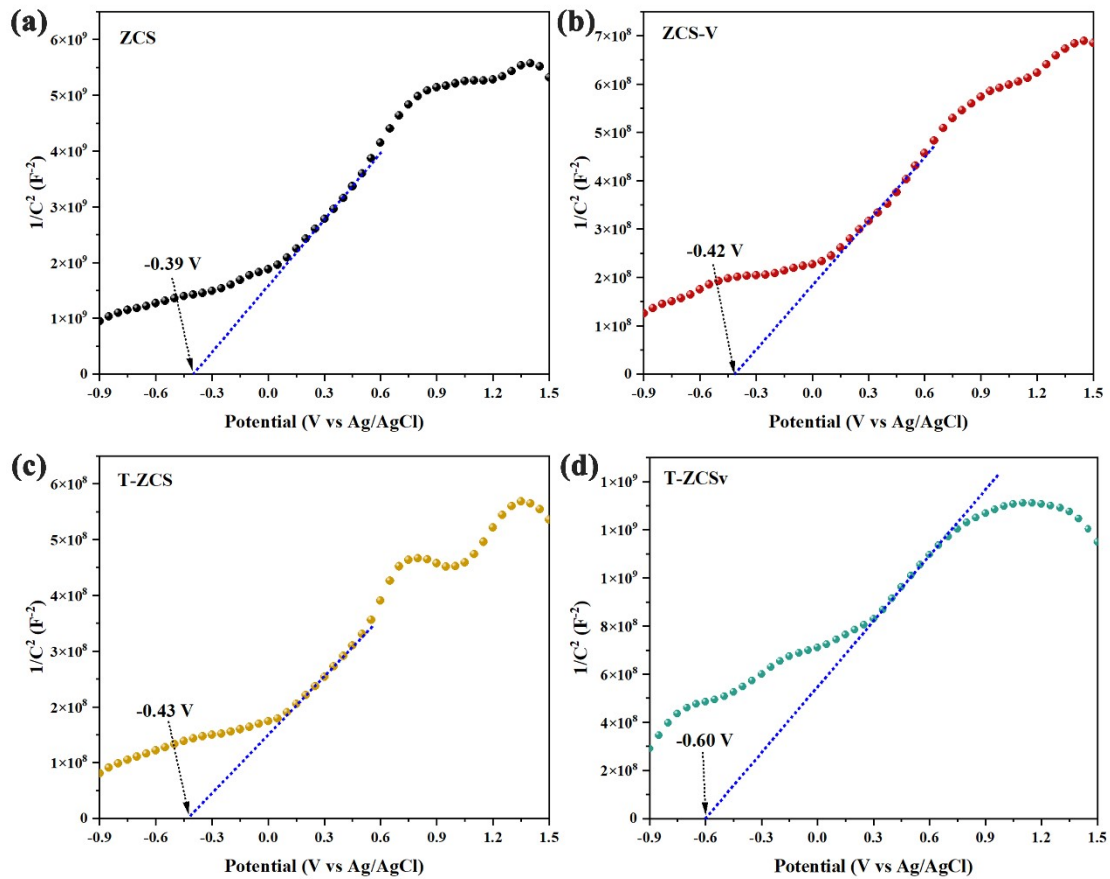

35

36 **Figure S2.** Mott-Schottky curves of (a) ZCS, (b) ZCS-V, (c) T-ZCS and (d) T-ZCSv samples

37

38 **Table S2.** The corresponding energy band structure of various samples

| Samples | $E_g$ (eV) | $E_{CB}$ (V) | $E_{VB}$ (V) |
|---------|------------|--------------|--------------|
| ZCS     | 2.31 eV    | -0.39 V      | 1.92 V       |
| ZCS-V   | 2.51 eV    | -0.42 V      | 2.09 V       |
| T-ZCS   | 2.47 eV    | -0.43 V      | 2.04 V       |
| T-ZCSv  | 2.60 eV    | -0.60 V      | 2.00 V       |

39

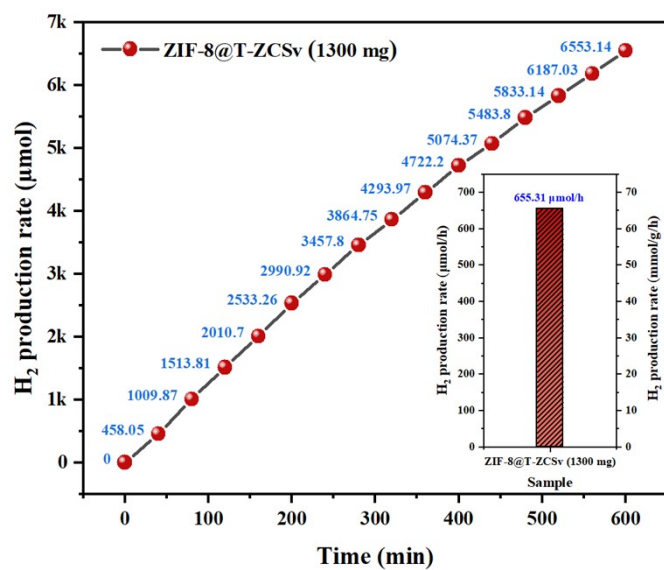

40

41 **Figure S3.** long-term activity and photocatalytic hydrogen generation rate of the ZIF-8@T-ZCSv

42

(1300 mg) with 10 hours

43

44 **Table S2.** Comparison of the H<sub>2</sub> revolution rates (HER) of ZnCdS based composites.

| Samples                                                                               | Light Sources |      |      | Catalyst<br>(mg) | Water<br>(mL) | Sacrificial reagent                                                                  | HER<br>( $\mu\text{mol/h}$ ) | Ref       |
|---------------------------------------------------------------------------------------|---------------|------|------|------------------|---------------|--------------------------------------------------------------------------------------|------------------------------|-----------|
|                                                                                       | (W)           | Type | (nm) |                  |               |                                                                                      |                              |           |
| ZIF-8@T-ZCSv (1300mg)                                                                 | 300           | Xe   | 420  | 10               | 50            | 0.25 M Na <sub>2</sub> SO <sub>3</sub> and 0.35M Na <sub>2</sub> S·9H <sub>2</sub> O | 583.25                       | This work |
| Zn <sub>0.5</sub> Cd <sub>0.5</sub> S/ZnO/Zn <sub>0.5</sub> Cd <sub>0.5</sub> S cages | 300           | Xe   | -    | 20               | 50            | 1.05 M Na <sub>2</sub> SO <sub>3</sub> and 0.75M Na <sub>2</sub> S                   | 572                          | 1         |
| Cd <sub>0.6</sub> Zn <sub>0.4</sub> S twinned crystals                                | 300           | Xe   | 420  | 50               | 80            | 0.15 M Na <sub>2</sub> SO <sub>3</sub> and 0.15 M Na <sub>2</sub> S                  | 472                          | 2         |
| 2Ni/4NiS/ZCS                                                                          | 300           | Xe   | 420  | 100              | 75            | 25 mL lactic acid                                                                    | 415.1                        | 3         |
| 3%MoS <sub>2</sub> /Zn <sub>0.5</sub> Cd <sub>0.5</sub> S                             | 300           | Xe   | 420  | 50               | 50            | 0.25 M Na <sub>2</sub> SO <sub>3</sub> and 0.35M Na <sub>2</sub> S·9H <sub>2</sub> O | 388.2                        | 4         |
| CZS/NMF-4                                                                             | 5             | LED  | -    | 10               | -             | 30 mL 10% lactic acid                                                                | 346.24                       | 5         |
| NBZ-3                                                                                 | 5             | Xe   | -    | 10               | -             | 30 mL 10% lactic acid                                                                | 304.2                        | 6         |
| T-ZCS                                                                                 | 300           | Xe   | 420  | 10               | 100           | 0.25 M Na <sub>2</sub> SO <sub>3</sub> and 0.35 M Na <sub>2</sub> S                  | 302.9                        | 7         |
| ZIF-67/Zn <sub>0.5</sub> Cd <sub>0.5</sub> S                                          | 5             | LED  | -    | 10               | -             | 30 mL 10% lactic acid                                                                | 232.64                       | 8         |
| C <sub>0.42</sub> Z <sub>0.58</sub> S-3 polyhedrons                                   | 300           | Xe   | 400  | 50               | 100           | 0.50 M Na <sub>2</sub> SO <sub>3</sub> and 0.75M Na <sub>2</sub> S                   | 205                          | 9         |
| ZnCdS–NiCoP10                                                                         | 5             | LED  | -    | 10               | -             | 30 mL 10% lactic acid                                                                | 157.94                       | 10        |
| hollow Zn <sub>0.6</sub> Cd <sub>0.4</sub> S cage                                     | 350           | Xe   | 420  | 25               | 50            | 1.05 M Na <sub>2</sub> SO <sub>3</sub> and 0.75M Na <sub>2</sub> S                   | 142                          | 11        |
| 8 Pt-Zn <sub>0.5</sub> Cd <sub>0.5</sub> S with ZB/WZ                                 | 500           | Xe   | 400  | 30               | 120           | 0.1 M Na <sub>2</sub> SO <sub>3</sub> and 0.1 M Na <sub>2</sub> S                    | 114.3                        | 12        |
| Zn <sub>0.5</sub> Cd <sub>0.5</sub> S QDs                                             | 300           | Xe   | 400  | 25               | 50            | 1.05 M Na <sub>2</sub> SO <sub>3</sub> and 0.75M Na <sub>2</sub> S                   | 92.5                         | 13        |
| P-ZnCdS nanocages                                                                     | 300           | Xe   | 400  | 20               | 100           | 0.45 M Na <sub>2</sub> SO <sub>3</sub> and 0.25M Na <sub>2</sub> S                   | 57.21                        | 14        |
| ZnCdS–CdS-3                                                                           | 350           | Xe   | 420  | 10               | 100           | Na <sub>2</sub> S (1.2 g) and Na <sub>2</sub> SO <sub>3</sub> (0.63 g)               | 27                           | 15        |

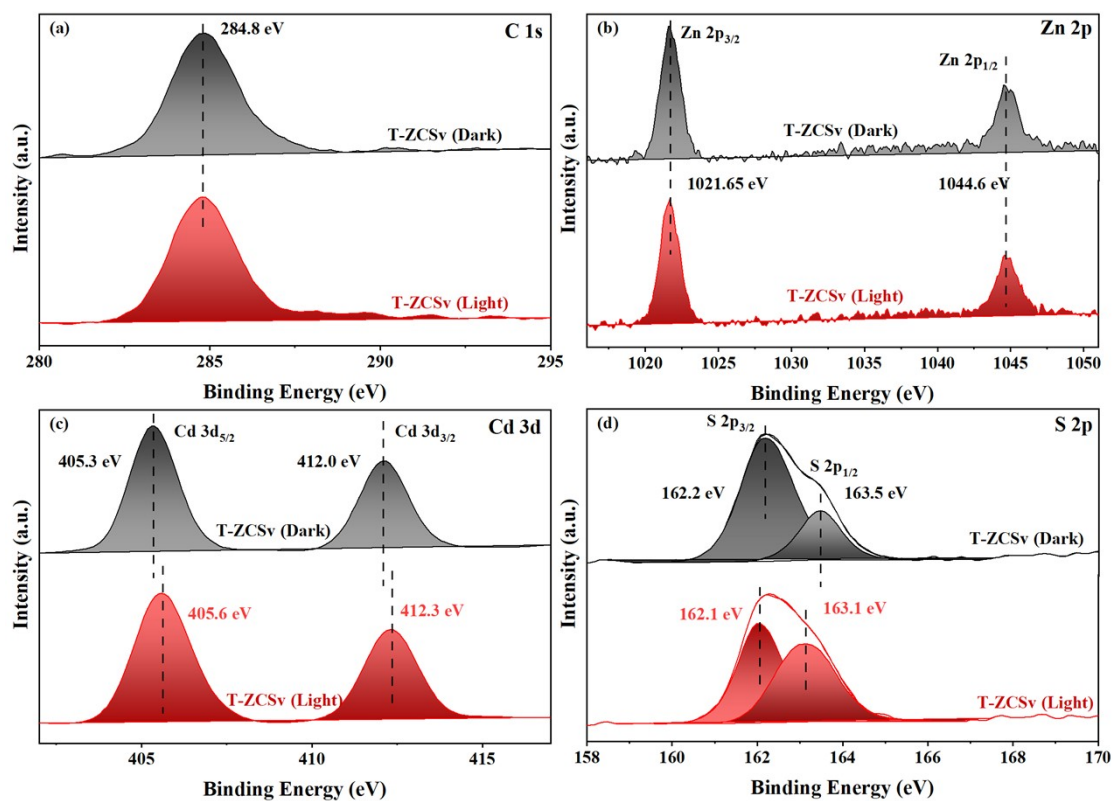

46

47 **Figure. S4.** The high-resolution in situ XPS spectra of pristine T-ZCSv for C 1s (a), Zn 2p (b), Cd  
 48 3d (c), S 2p (d).

49

## 50 References

51

52 1 J. Chen, Z. Shen, S. Lv, K. Shen, R. Wu, X. Jiang, T. Fan, J. Chen and Y. Li, Fabricating sandwich-shelled  
53 ZnCdS/ZnO/ZnCdS dodecahedral cages with “one stone” as Z-scheme photocatalysts for highly efficient  
54 hydrogen production, *J Mater Chem A*, 2018, **6**, 19631-19642.

55 2 J. Wang, Y. Ma, X. Jiang and H. Du, Vectorial carriers interfacial migration of Cd<sub>1-x</sub>Zn<sub>x</sub>S heterophase junctions  
56 for visible-light water splitting, *J Alloy Compd*, 2021, **854**, 156850.

57 3 Y. Sun, C. Xu, H. Ma, G. Li, L. Chen, Y. Sun, Z. Chen, P. Fang, Q. Fu and C. Pan, Synthesis of flower-liked  
58 twin crystal ternary Ni/NiS/Zn<sub>0.2</sub>Cd<sub>0.8</sub>S catalyst for highly efficient hydrogen production, *Chem Eng J*, 2021,  
59 **406**, 126878.

60 4 Y. Zhang, D. Lu, H. Li, K. K. Kondamareddy, H. Wang, B. Zhang, J. Wang, Q. Wu, Y. Zeng and X. Zhang,  
61 Enhanced visible Light-Driven photocatalytic hydrogen evolution and stability for noble Metal-Free  
62 MoS<sub>2</sub>/Zn<sub>0.5</sub>Cd<sub>0.5</sub>S heterostructures with W/Z phase junctions, *Appl Surf Sci*, 2022, **586**, 152770.

63 5 M. Li, J. Li and Z. Jin, 0D/2D spatial structure of Cd<sub>x</sub>Zn<sub>1-x</sub>S/Ni-MOF-74 for efficient photocatalytic hydrogen  
64 evolution, *Dalton T*, 2020, **49**, 5143-5156.

65 6 Y. Cao, G. Wang, Q. Ma and Z. Jin, An amorphous nickel boride-modified Zn<sub>x</sub>Cd<sub>1-x</sub>S solid solution for  
66 enhanced photocatalytic hydrogen evolution, *Dalton T*, 2020, **49**, 1220-1231.

67 7 L. Guo, G. Yu, H. Zhao, C. Xing, Y. Hu, T. Chen and X. Li, Construction of heterojunctions between ReS<sub>2</sub> and  
68 twin crystal Zn<sub>x</sub>Cd<sub>1-x</sub>S for boosting solar hydrogen evolution, *New J Chem*, 2021, **45**, 5137-5145.

69 8 H. Gong, X. Zhang, G. Wang, Y. Liu, Y. Li and Z. Jin, Dodecahedron ZIF-67 anchoring ZnCdS particles for  
70 photocatalytic hydrogen evolution, *Mol Catal*, 2020, **485**, 110832.

71 9 F. Mu, S. Zhou, Y. Wang, J. Wang and Y. Kong, Bimetallic metal-organic frameworks-derived mesoporous  
72 Cd<sub>x</sub>Zn<sub>1-x</sub>S polyhedrons for enhanced photocatalytic hydrogen evolution, *J Mater Res*, 2019, **34**, 1773-1784.

73 10 H. Liu, P. Su, Z. Jin and Q. Ma, Enhanced Hydrogen Evolution over Sea-Urchin-Structure NiCoP Decorated  
74 ZnCdS Photocatalyst, *Catal Lett*, 2020, **150**, 2937-2950.

75 11 J. Chen, J. Chen and Y. Li, Hollow ZnCdS dodecahedral cages for highly efficient visible-light-driven hydrogen  
76 generation, *J Mater Chem A*, 2017, **5**, 24116-24125.

77 12 B.-J. Ng, L. K. Putri, X. Y. Kong, K. P. Y. Shak, P. Pasbakhsh, S.-P. Chai and A. R. Mohamed, Sub-2nm Pt-  
78 decorated Zn<sub>0.5</sub>Cd<sub>0.5</sub>S nanocrystals with twin-induced homojunctions for efficient visible-light-driven  
79 photocatalytic H<sub>2</sub> evolution, *Appl Catal B-Environ*, 2018, **224**, 360-367.

80 13 J. Chen, S. Lv, Z. Shen, P. Tian, J. Chen and Y. Li, Novel ZnCdS quantum dots engineering for enhanced  
81 visible-light-driven hydrogen evolution, *Acs Sustain Chem Eng*, 2019, **7**, 13805-13814.

82 14 Q. Zhu, Z. Xu, Q. Yi, M. Nasir, M. Xing, B. Qiu and J. Zhang, Prolonged electron lifetime in sulfur vacancy-  
83 rich ZnCdS nanocages by interstitial phosphorus doping for photocatalytic water reduction, *Mater Chem Front*,  
84 2020, **4**, 3234-3239.

85 15 T. Bai, X. Shi, M. Liu, H. Huang, M.-H. Yu, J. Zhang and X.-H. Bu, A metal–organic framework-derived  
86  $Zn_{1-x}Cd_xS/CdS$  heterojunction for efficient visible light-driven photocatalytic hydrogen production, *Dalton T*,  
87 2021, **50**, 6064-6070.  
88
